# Supplementary figures and images for: Immobilization of Urease onto Nanochitosan Enhanced the Enzyme Efficiency: Biophysical Studies and in Vitro Clinical Application on Nephropathy Diabetic Iraqi Patients
Source: Hindawi journal article supplement (doi:10.1155/2022/8288585), 2022-06-08

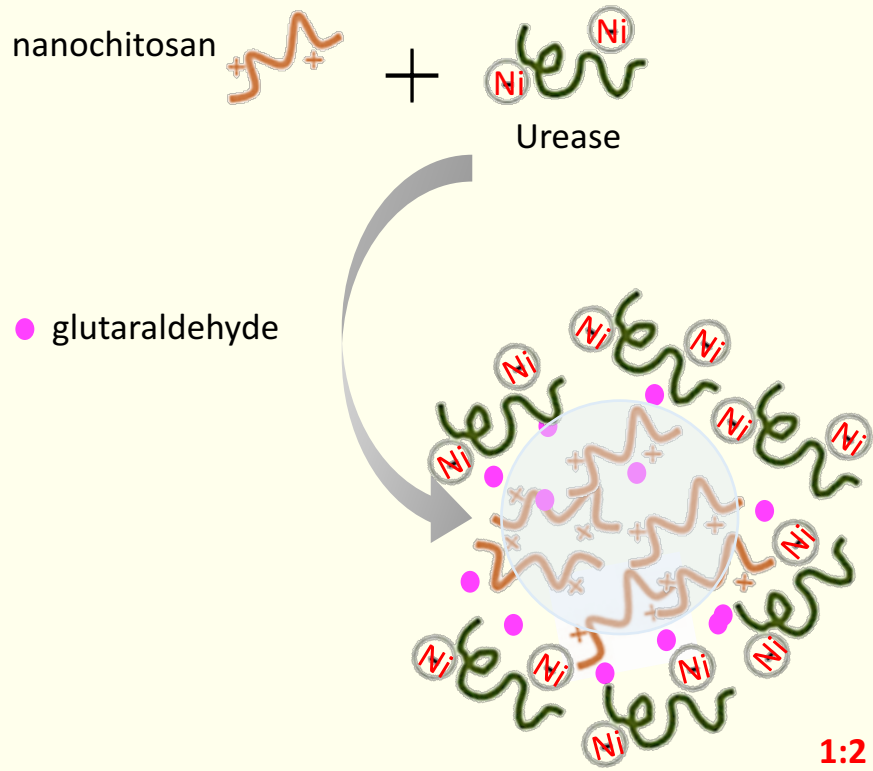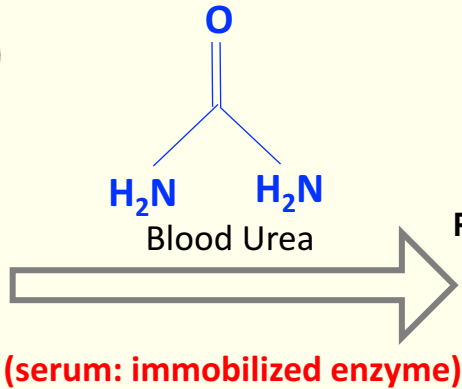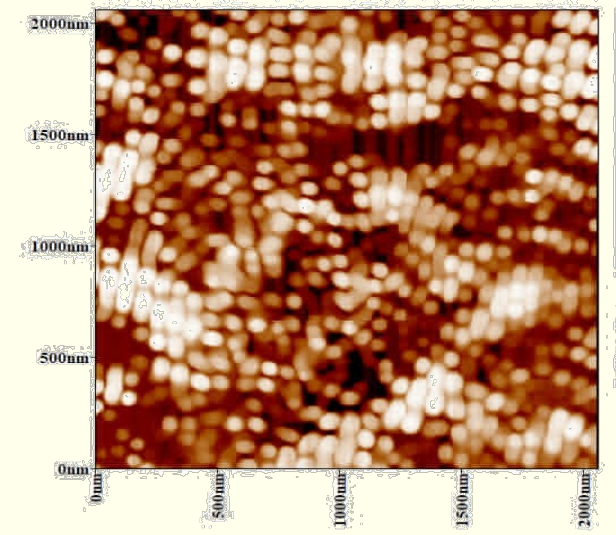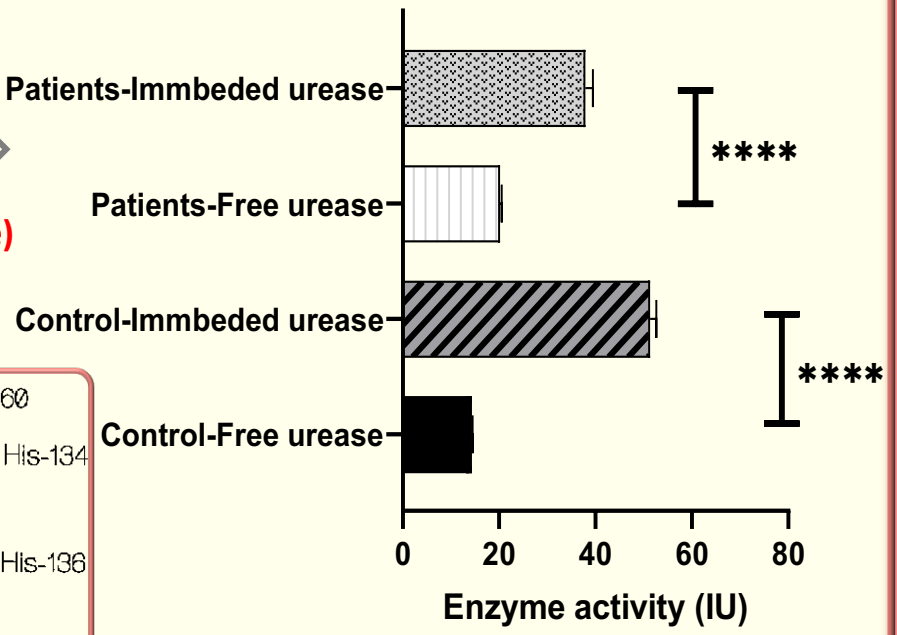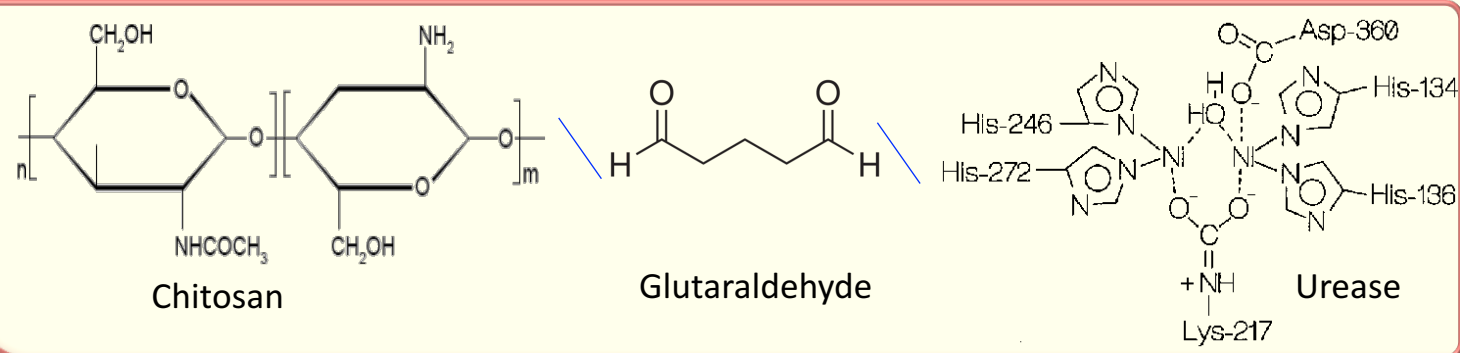

Supplement: f1 [file 8288585.f1.pdf]
